# Supplementary material
Source: PubMed Central journal article supplement (PMC4384829)

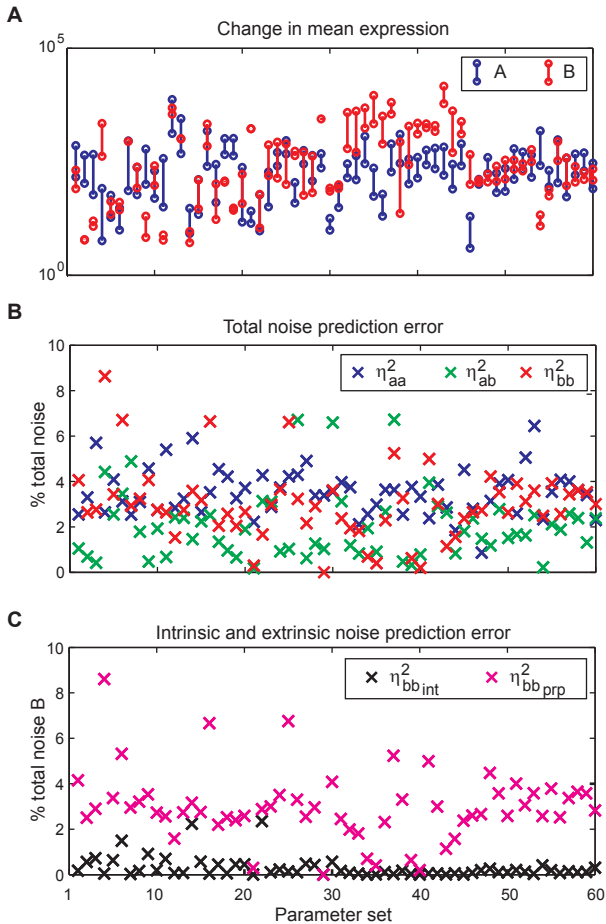

True topology

Topology tested

A → B

A ⊣ B

A B

A ⊣ B

A ⊣ X ⊣ B

A → B

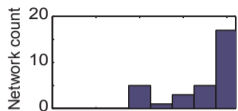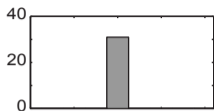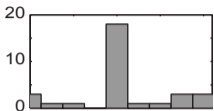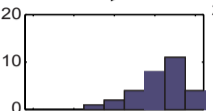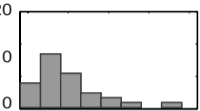

B → A

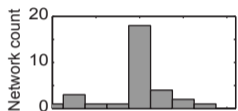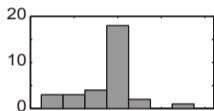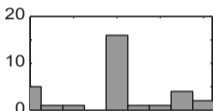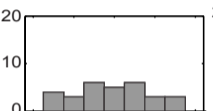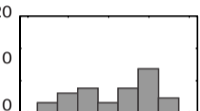

A ⊣ B

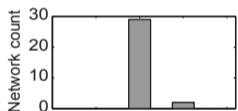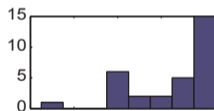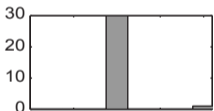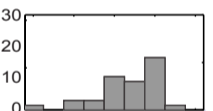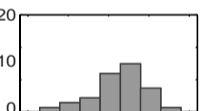

B ⊣ A

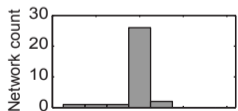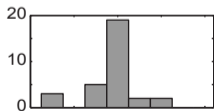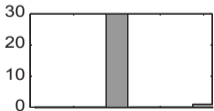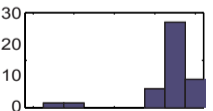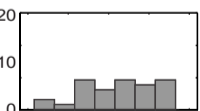

Correlation score

■ correct topology    ■ incorrect topology



Dynamic noise propagation

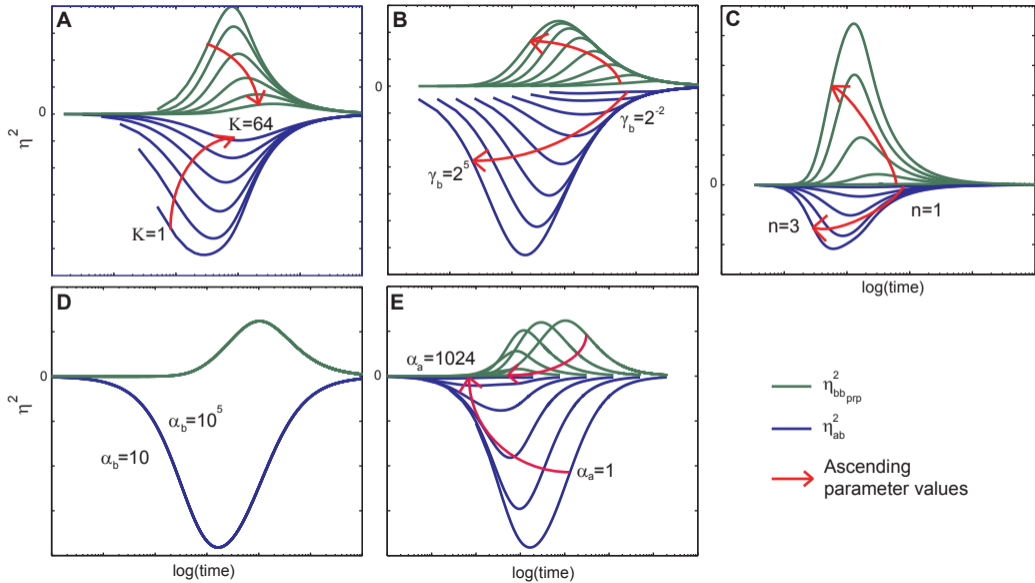

## Network

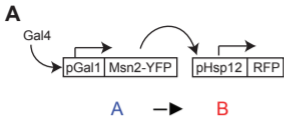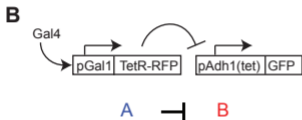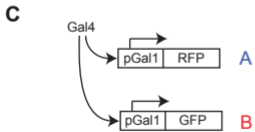

## Fit to mean

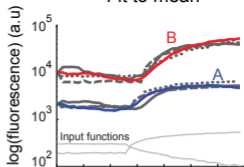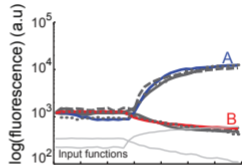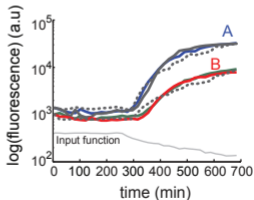

Fitted model:

- Regulation by gene A or B
- - - A and B co-regulated: activation
- · · · A and B co-regulated: inhibition

Percent improvement with second moment

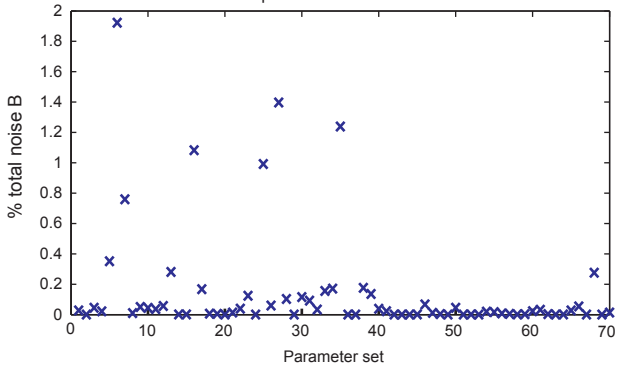

$\times \frac{(\text{difference of predictions})}{\eta_{bb}^2}$

**A**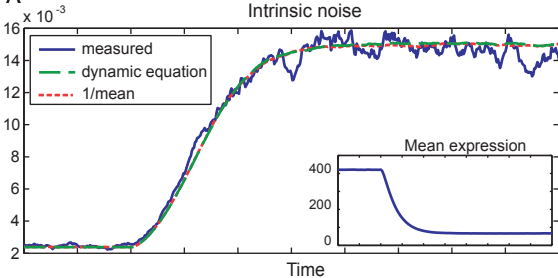**B**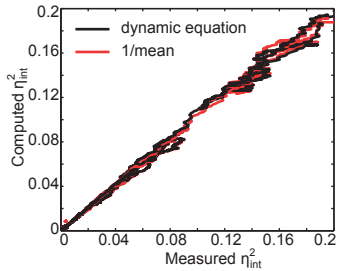

Network

 $A \rightarrow B$ 

Network

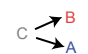

Global noise

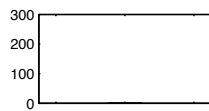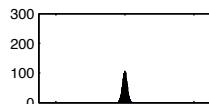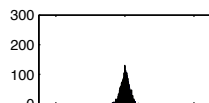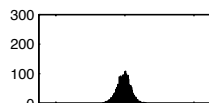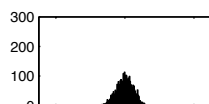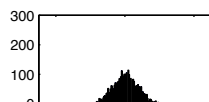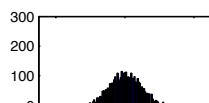

-200 0 200

Topology tested

 $A \rightarrow B$  $B \rightarrow A$ 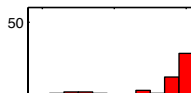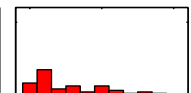 $A \rightarrow B$  $B \rightarrow A$ 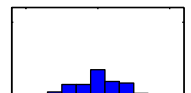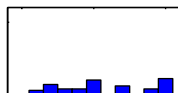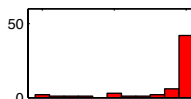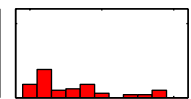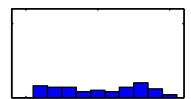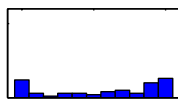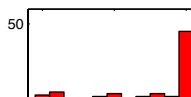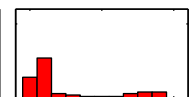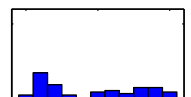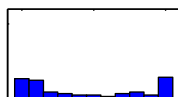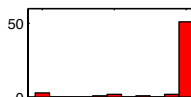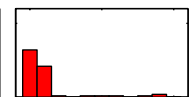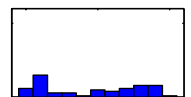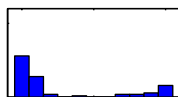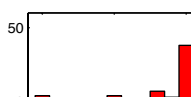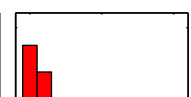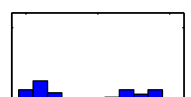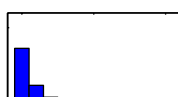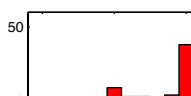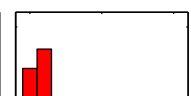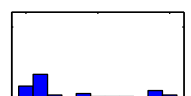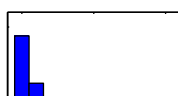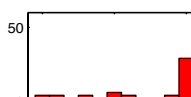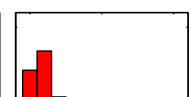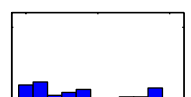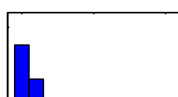

Correlation



Network

$A \rightarrow B$

Network

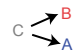

Sampling rate

Topology tested

$A \rightarrow B$

$B \rightarrow A$

Topology tested

$A \rightarrow B$

$B \rightarrow A$

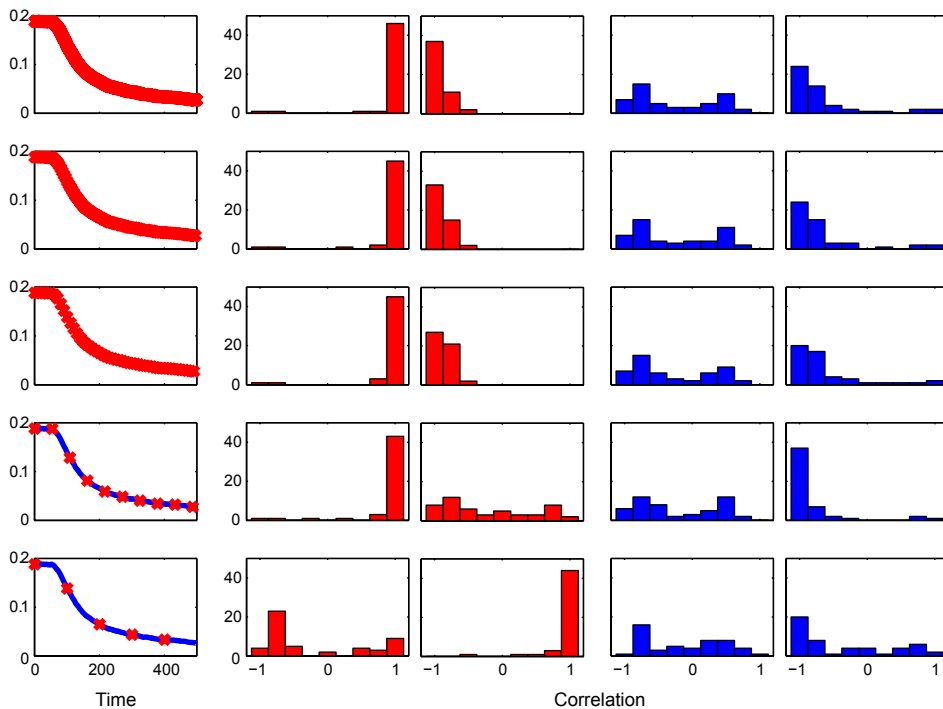

Supplement: sb5000059_si_002.pdf [file sb5000059_si_002.pdf]
